# Supplementary material
Source: publisher figshare collection journal article supplement (https://tandf.figshare.com/ndownloader/files/13877951)
Supplement: Supplementary file 1 [file 13877951]

## Sheet: InfluencePerTerm
Supplementary material, Figure S5: "Influence" statistics by year for each of the non-year terms in the GLM equation 3 described in Methods of the text.
Source table for influence index values in Figure S5.
FsYr	Vessel	Fisher	Month	Depth	Region
1978	0.844618	0.919869	1.01625	1.00729	0.993165
1979	0.824422	0.939908	1.01435	1.00125	0.994372
1980	0.836333	0.938963	1.06774	0.991719	0.996699
1981	0.844521	0.943105	1.04143	1.00153	1.00222
1982	0.866845	0.920279	1.03236	0.993885	0.987841
1983	0.892198	0.93191	1.05463	1.00407	1.00784
1984	0.90441	0.934495	1.04068	1.00301	1.0123
1985	0.93102	0.925589	1.03055	1.00023	1.00989
1986	0.943685	0.938467	1.03912	1.00513	1.02047
1987	0.919363	0.93653	1.05661	1.00021	1.0217
1988	0.930848	0.916854	1.03774	1.00279	1.01536
1989	0.935645	0.939431	1.03122	1.00169	0.998876
1990	1.00043	0.917127	0.996992	1.00046	0.987814
1991	0.968101	0.930151	1.00163	1.00182	0.983257
1992	0.936483	0.97055	0.984846	1.00401	0.983916
1993	0.979458	0.981347	0.971311	1.00646	0.989338
1994	1.01929	1.00224	0.968817	1.00798	0.987233
1995	1.05107	1.01119	0.977968	1.00768	0.977505
1996	1.05937	1.00179	0.975854	1.01322	0.985395
1997	1.05577	1.01686	0.972887	1.00468	0.989022
1998	1.04996	1.05279	0.977056	1.00805	0.992173
1999	1.05755	1.04908	0.949045	1.00373	0.994253
2000	1.04688	1.05891	0.979452	0.995445	0.997802
2001	1.05516	1.04493	0.998467	0.993712	1.01564
2002	1.07755	1.04887	0.987834	0.992558	1.01195
2003	1.07971	1.09156	0.970048	0.997775	1.0136
2004	1.07403	1.08353	0.957635	1.00014	1.01547
2005	1.10112	1.06154	0.991593	0.999486	1.00566
2006	1.07104	1.07907	1.03545	0.996488	1.00371
2007	1.06832	1.07375	1.05268	1.00084	1.00899
2008	1.07203	1.07516	1.01438	0.995256	1.01555
2009	1.06644	1.05074	0.973681	0.985694	1.01128
2010	1.08954	1.05182	0.970262	0.985578	0.99666
2011	1.11417	1.03755	0.993429	0.988214	1.00259
2012	1.13685	1.06285	0.982125	0.984794	1.00897
2013	1.1333	1.07273	1.00249	0.980531	1.01124
2014	1.12954	1.06824	0.980231	0.984418	1.02115
